# Supplementary material for: A predictive model for the severity of COVID-19 in elderly patients
Source: publisher site journal article supplement (doi:10.18632/aging.103980), 2020-11-07
Supplement: Supplementary file [file aging-v12i21-103980-supplementary-material-SD1.pdf]

## SUPPLEMENTARY FIGURE

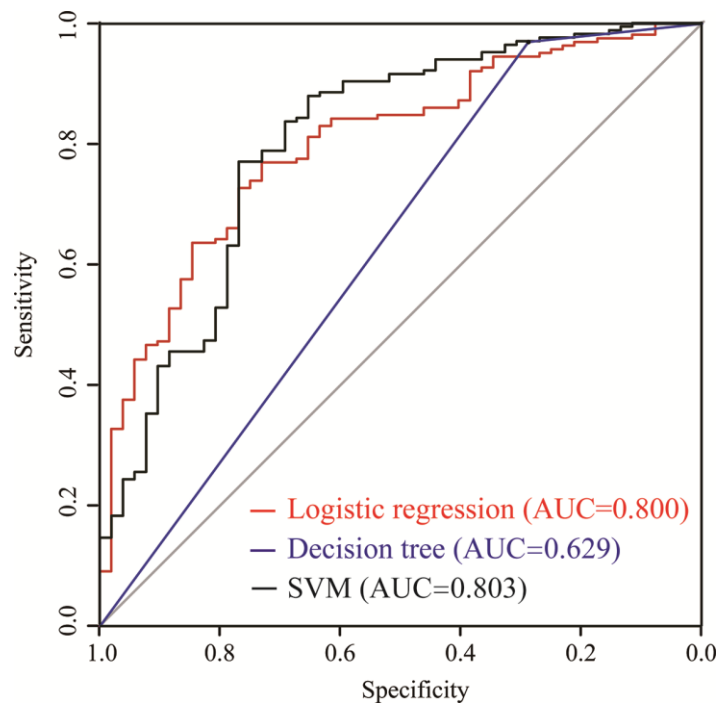

Supplementary Figure 1. Receiver operating characteristic (ROC) curves of different predictive models using logistic regression (red), decision tree (blue), and support vector machine (black).
